# Supplementary material for: Thiophene-free diphenyl-amino-stilbene-diketo-pyrrolo-pyrrole derivatives as donors for organic bulk heterojunction solar cells
Source: publisher site journal article supplement (doi:10.1515/chempap-2016-0068), 2016-01-01
Supplement: Supplementary file 1 [file chempap-2016-0068_supplement.docx]

**SUPPLEMENTARY DATA**

Thiophene-free diphenyl-amino-stilbene-diketo-pyrrolo-pyrrole derivatives as donors for organic bulk heterojunction solar cells

**aJana Honová, aStanislav Luňák, aMartin Vala, aStanislav Stříteský, bLadislav Fekete, aMartin Weiter, aAlexander Kovalenko[[1]](#footnote-1)***

aBrno University of Technology, Faculty of Chemistry, Materials Research Centre, Purkyňova 118, 612 00 Brno, Czech Republic

bInstitute of Physics, Academy of Sciences Czech Republic v.v.i, Na Slovance 2, CZ-182 21, Prague 8, Czech Republic

Received 16 December 2015; Revised 23 February 2016; Accepted 23 February 2016

**Fig. S1.** Absorption spectra in toluene

**Fig. S2.** Fluorescence spectra in toluene

**Fig. S3.** Supporting information OFET measurement: Channel Length 2,5 mm, Channel Width 10 mm, measured under dark in nitrogen atmosphere at *V*SD = -40 V.

1. *Corresponding author, e-mail: kovalenko.alx@gmail.com [↑](#footnote-ref-1)
